# Supplementary material
Source: MDPI journal article supplement (https://www.mdpi.com/2073-4395/13/1/113)
Supplement: s1 [file s1]

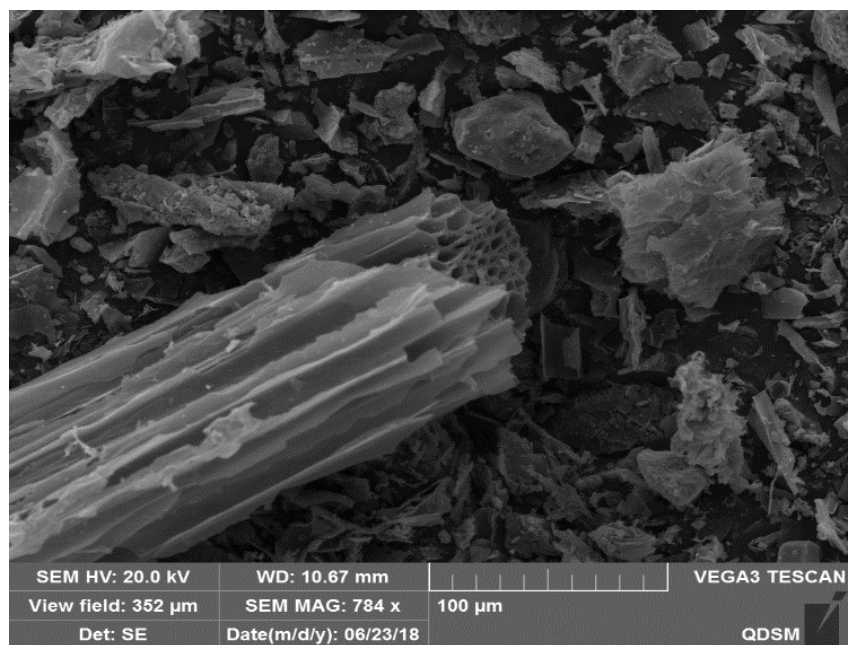

**Figure S1.** Scanning electron microscope (SEM) image of maize straw-biochar.

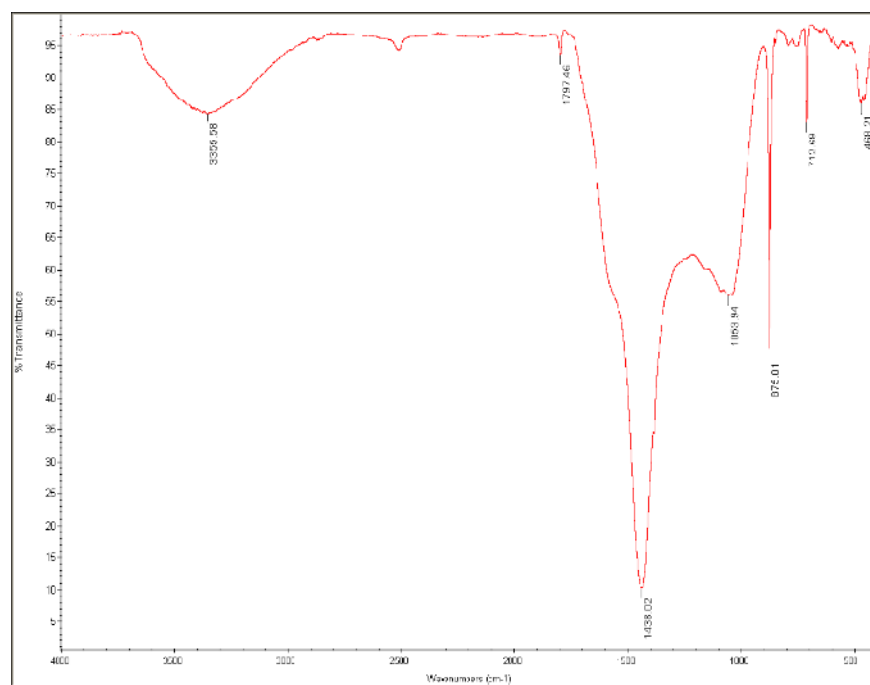

**Figure S2.** Fourier transform infrared (FTIR) spectrum of maize straw-biochar.

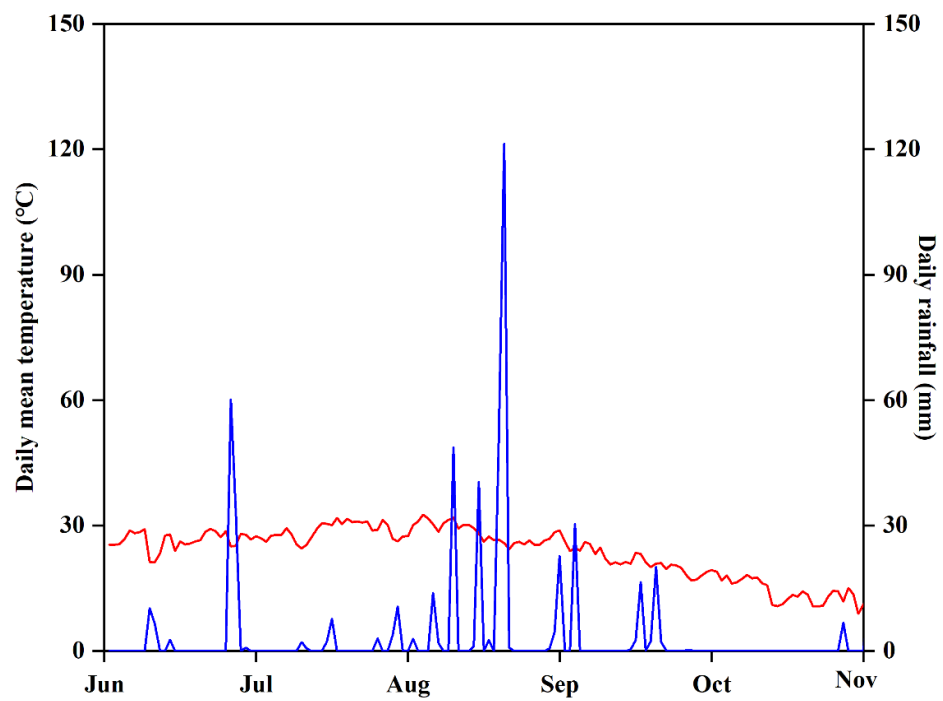

**Figure S3.** Daily mean temperature and precipitation during the plant growth period of maize.

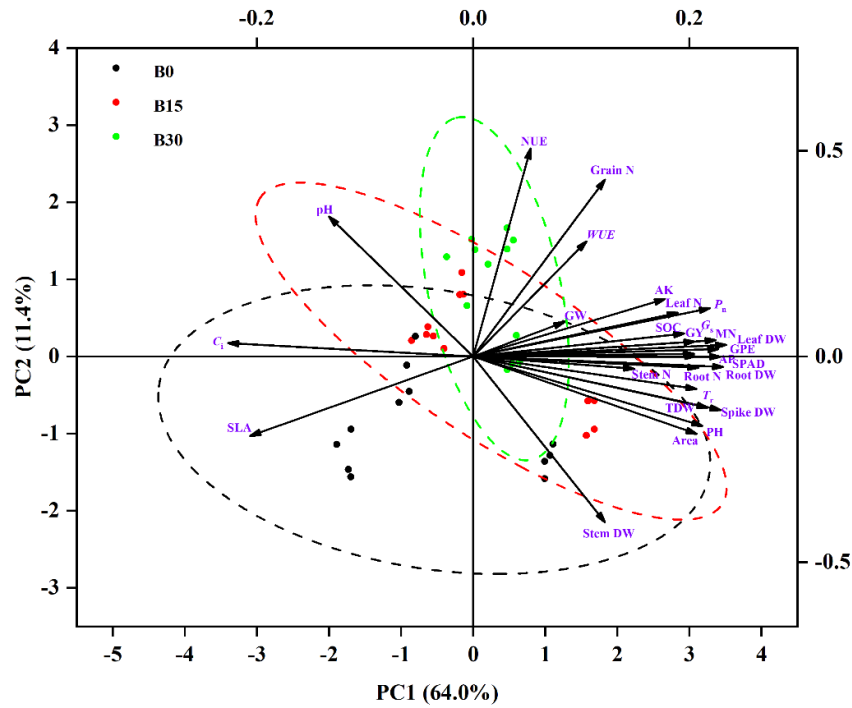

**Figure S4.** Biplot of first (PC1) and second (PC2) principal components of 36 evaluated traits in different biochar treatments. AK – available potassium content, AP – available phosphorus content, Area – leaf area, C<sub>i</sub> – intercellular CO<sub>2</sub> concentration, GE – grains per ear, G<sub>s</sub> – stomatal conductance, Grain N – nitrogen content in maize grain, GW – 100-grain weight, GY – grain yield, Leaf DW – dry weight of maize leaf, Leaf N – nitrogen content in maize leaf, MN – mineral nitrogen content, NUE – nitrogen utilization efficiency, P<sub>n</sub> – net photosynthetic rate, pH – soil pH, PH – plant height, Root DW – dry weight of maize root, Root N – nitrogen contents in maize root, SLA – specific leaf area, SOC – soil organic carbon, Spike DW – dry weight of maize spike, SPAD – leaf SPAD values, Stem DW – dry weight of maize stem, Stem N – nitrogen content in maize stem, T<sub>r</sub> – transpiration rate, WUE – water use efficiency.
